# Supplementary material for: A new strategy for selective detection of nitrated explosives based on a confinement effect of nanocavity
Source: Royal Society of Chemistry journal article supplement (doi:10.1039/c3ta11881a), 2013-01-01
Supplement: c3ta11881a.pdf [file c3ta11881a.pdf]

## Supporting Information

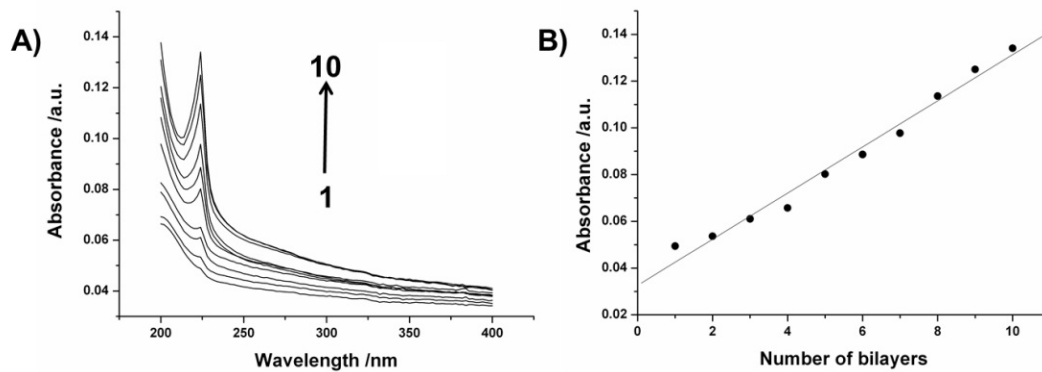

**Figure S1.** A) The Adsorption spectra of film with different layers of chitosan / CB[8]-naphthalene; (B) The relationship between the absorbance intensity (225 nm) with the number of layers.

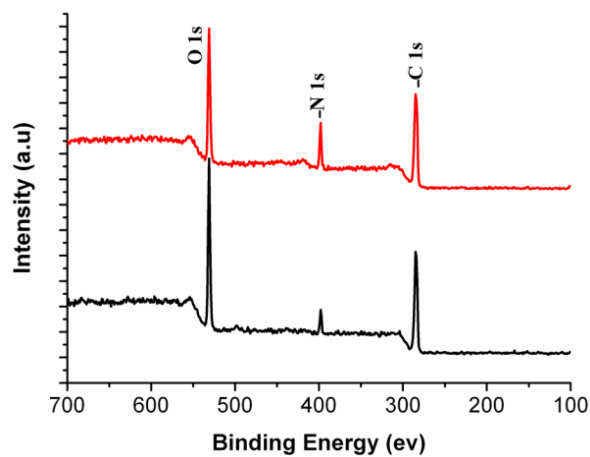

**Figure S2.** XPS spectra of chitosan film (black line) and chitosan-CB[8]-naphthalene film (red line).

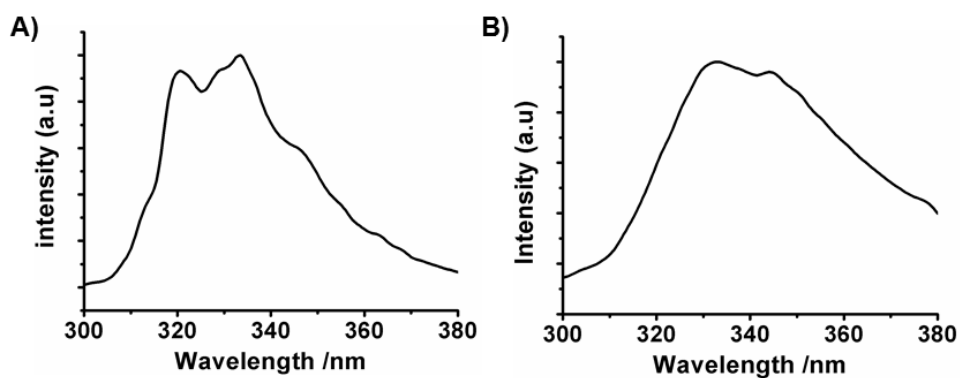

**Figure S3.** Fluorescence emissions of naphthalene in bulk solution (A) and in CB[8] cavity attached on substrate.

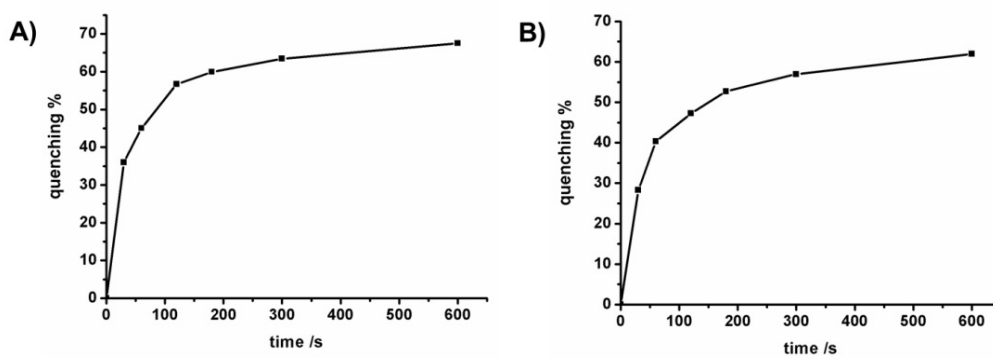

**Figure S4.** Time-dependent fluorescence quenching of chitosan-CB[8]-naphthalene based film upon exposure to TNT vapor (10ppb) (A) and DNT (180 ppb) (B).

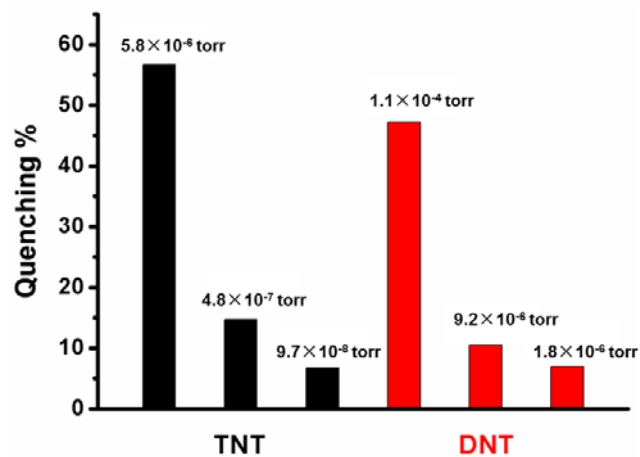

**Figure S5.** Comparison of fluorescence response of the fabricated sensors to TNT and DNT at different concentration for 2 min.

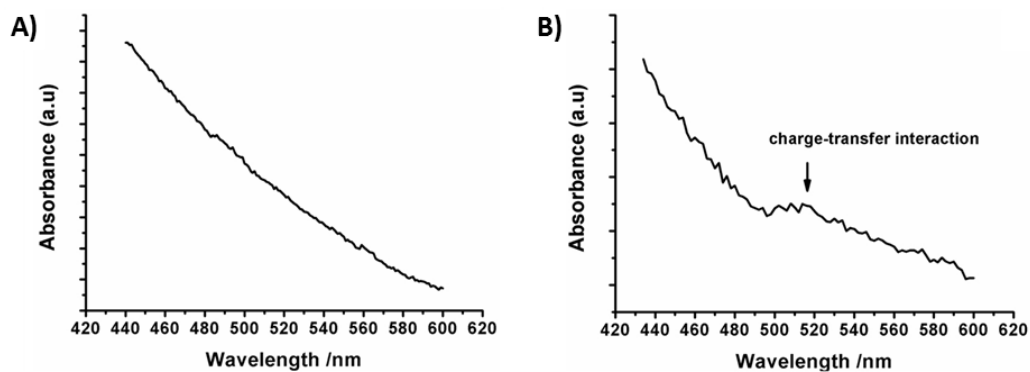

**Figure S6.** UV-Vis spectra of (A) the formed CB[8]• NA• TNT complex and (B) CB[8]• NA

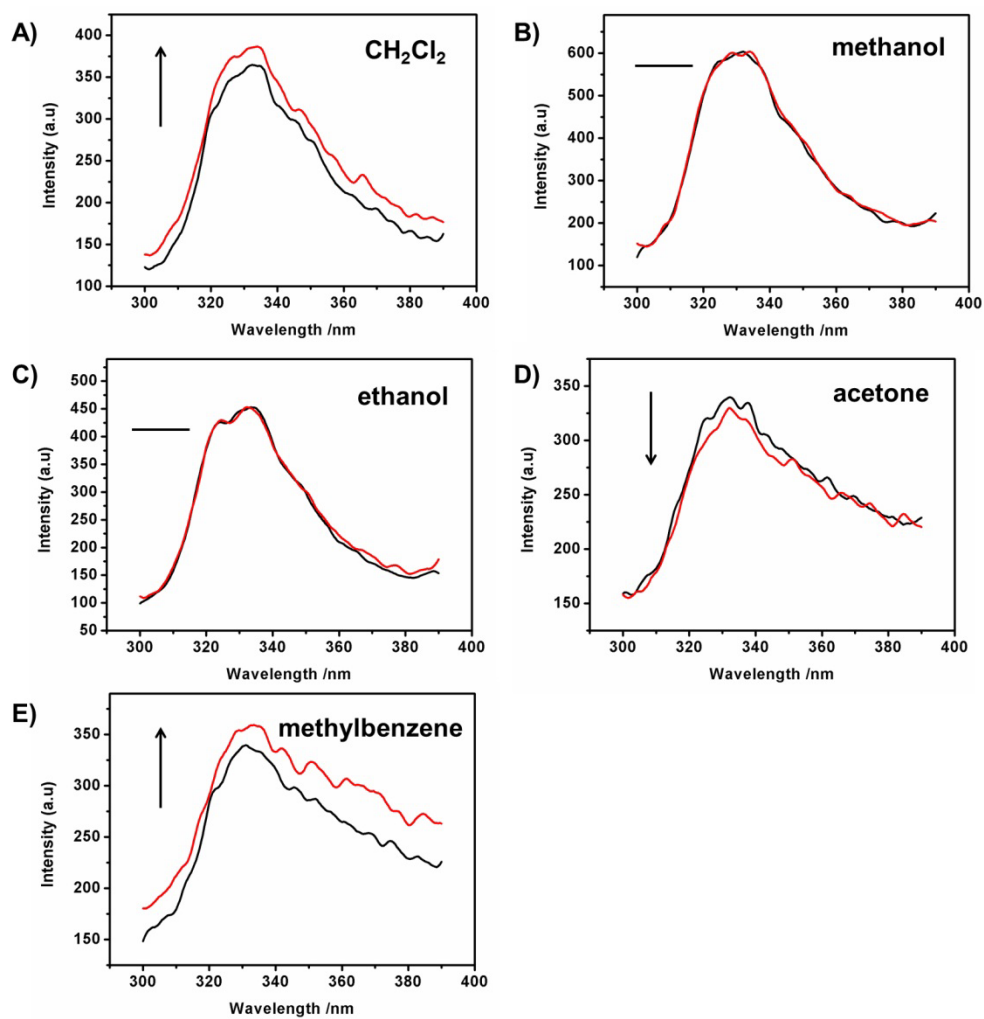

**Figure S7.** Time-dependent fluorescence intensity of the naphthalene-CB[8] film on solid substrate upon exposure to the vapor of toluene, acetone, CH<sub>2</sub>Cl<sub>2</sub>, ethanol and methanol at 0 min (black line), and 3 min (red line).
